# Supplementary material for: Functional analysis of CYP6ER1, a P450 gene associated with imidacloprid resistance in Nilaparvata lugens
Source: PubMed Central journal article supplement (PMC5056347; doi:10.1038/srep34992), 2016-10-10
Supplement: srep34992-s1.pdf [file srep34992-s1.pdf]

1 **Supplementary Information**

2

3 **Functional analysis of *CYP6ER1*, a P450 gene associated with imidacloprid resistance in *Nilaparvata lugens***

4

5 **Author information**

6 **Rui Pang<sup>a1</sup>, Meng Chen<sup>a1</sup>, Zhikun Liang<sup>a</sup>, Xiangzhao Yue<sup>a</sup>, Hu Ge<sup>b</sup>, Wenqing Zhang<sup>a\*</sup>.**

7 a. State Key Laboratory of Biocontrol, School of Life Sciences, Sun Yat-sen University, Guangzhou, China, 510006.

8 b. School of Pharmaceutical Science, Sun Yat-sen University, Guangzhou, China, 510006

9

10 \* Corresponding author: Wenqing Zhang

11 E-mail: [lsszwq@mail.sysu.edu.cn](mailto:lsszwq@mail.sysu.edu.cn)

12 Tel: (+86) 020 39332963,

13 Fax: (+86) 020 39943515.

14

15 1 Both authors contributed equally to this work and should be considered co-first authors

16 E-mail addresses:

17 Rui Pang: [pr839@163.com](mailto:pr839@163.com)

18 Meng Chen: [mytinco@qq.com](mailto:mytinco@qq.com)

19 Zhikun Liang: [pardonliang@126.com](mailto:pardonliang@126.com)

20 Xiangzhao Yue: [kathy126@yeah.net](mailto:kathy126@yeah.net)

21 Hu Ge: [gehuchina@gmail.com](mailto:gehuchina@gmail.com)

22 **Table S1. PCR primers used in this study.**

| Primers name    | Purpose                                                      | Primer sequence                 |
|-----------------|--------------------------------------------------------------|---------------------------------|
| 6ER1-RNAi-F     | ds <i>CYP6ER1</i> synthesis                                  | 5'-CCCCCTCTCACACCATCTGTT-3'     |
| 6ER1-RNAi-R     | ds <i>CYP6ER1</i> synthesis                                  | 5'-CGACTCTTTGCTTTTTTCAATCTCC-3' |
| GFP-RNAi-F      | ds <i>GFP</i> synthesis                                      | 5'-AAGGGCGAGGAGCTGTTCCACCG-3'   |
| GFP-RNAi-R      | ds <i>GFP</i> synthesis                                      | 5'-CAGCAGGACCATGTGATCGCGC-3'    |
| ACTIN-F         | RT-PCR (Actin)                                               | 5'-TGC GTGACATCAAGGAGAAGC-3'    |
| ACTIN-R         | RT-PCR (Actin)                                               | 5'- CCATACCCAAGAAGGAAGGCT-3'    |
| 6ER1-dsRNA-RT-F | RT-PCR ( <i>CYP6ER1</i> in RNAi research)                    | 5'-ATTCCGGTCTATGCGCTTC-3'       |
| 6ER1-dsRNA-RT-R | RT-PCR ( <i>CYP6ER1</i> in RNAi research)                    | 5'-TGGATTGGCGCTCTTACT-3'        |
| 6ER1-RT-F       | RT-PCR ( <i>CYP6ER1</i> , which was cloned in this research) | 5'-TTCCGTTAGTGC GTTGGTTAC-3'    |
| 6ER1-RT-R       | RT-PCR ( <i>CYP6ER1</i> , which was cloned in this research) | 5'-AATGGTTCTCCCACTGGATTT-3'     |

24 **Table S2. BLAST search and sequence alignment.**

| Protocol   |                  | PSI-BLAST Search               |
|------------|------------------|--------------------------------|
| Parameters | Target sequence  | Cytochrome P450 <i>CYP6ER1</i> |
|            | Database         | PDB_nr95                       |
|            | E-value Cutoff   | 10                             |
|            | Maximum Hits     | 100                            |
|            | Scoring Matrix   | BLOSUM62                       |
| Result     | PDB code         | 3NXU                           |
|            | Identity         | 31%                            |
|            | Sequence length  | 457                            |
|            | Alignment length | 480                            |
|            | E-value          | 1.63273e-91                    |
|            | Positive         | 52                             |
|            | Resolution       | 2                              |
|            | SCOP             | a.104.1.1                      |
|            | Ligand           | HEM and RIT                    |
|            | Description      | Cytochrome P450 3A4            |

25

26

27

28

29

30 **Table S3. Model scores from the homology modeling of *CYP6ER1*.**

| <b>Name</b> | <b>PDF Total Energy</b> | <b>PDF Physical Energy</b> | <b>DOPE Score</b> |
|-------------|-------------------------|----------------------------|-------------------|
| 6ER1.M0011  | 4880.4561               | 1866.3110218               | -52366.699219     |
| 6ER1.M0016  | 4991.5415               | 1956.281103                | -52570.093750     |
| 6ER1.M0003  | 5013.8979               | 1924.61454914              | -51440.234375     |
| 6ER1.M0009  | 5061.2505               | 2031.34542017241           | -51891.925781     |
| 6ER1.M0014  | 5069.5327               | 1947.6158598               | -52380.808594     |
| 6ER1.M0008  | 5095.7954               | 1914.9310658               | -51684.746094     |
| 6ER1.M0005  | 5098.7485               | 1948.59656096              | -51379.964844     |
| 6ER1.M0017  | 5154.1743               | 2079.17296940001           | -51415.792969     |
| 6ER1.M0015  | 5168.4302               | 2012.83729205              | -51804.324219     |
| 6ER1.M0001  | 5178.3896               | 1975.23588675              | -51668.664063     |
| 6ER1.M0018  | 5230.6372               | 1987.3336503               | -51077.031250     |
| 6ER1.M0007  | 5249.3813               | 2101.75486200001           | -52651.351563     |
| 6ER1.M0019  | 5286.7007               | 2144.36547100024           | -50818.742188     |
| 6ER1.M0006  | 5374.6938               | 2185.4297581               | -51437.210938     |
| 6ER1.M0012  | 5381.5293               | 2126.134128                | -51458.792969     |
| 6ER1.M0020  | 5406.6074               | 2088.49494070001           | -51285.609375     |
| 6ER1.M0010  | 5543.0605               | 2130.575033245             | -50681.925781     |
| 6ER1.M0002  | 5580.2217               | 2235.2910817               | -51170.558594     |
| 6ER1.M0004  | 5736.0063               | 2166.807654                | -50950.031250     |
| 6ER1.M0013  | 5754.1113               | 2080.516687                | -51081.066406     |

31

32

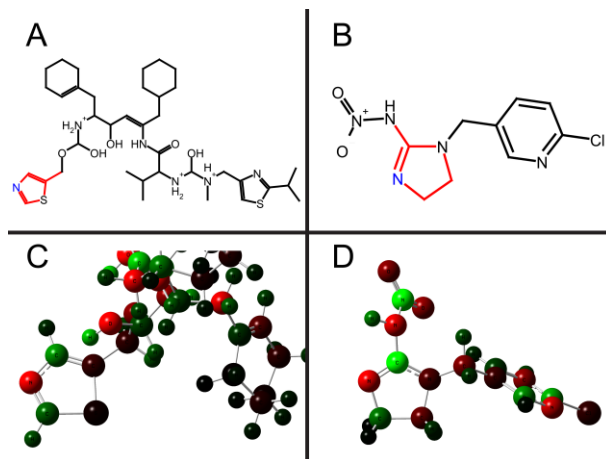

33

34

35 **Figure S1. Molecular structure and approximate comparison of the ESP charge distribution**  
 36 **of RIT (A, C) and IM4 (B, D).**

37

38

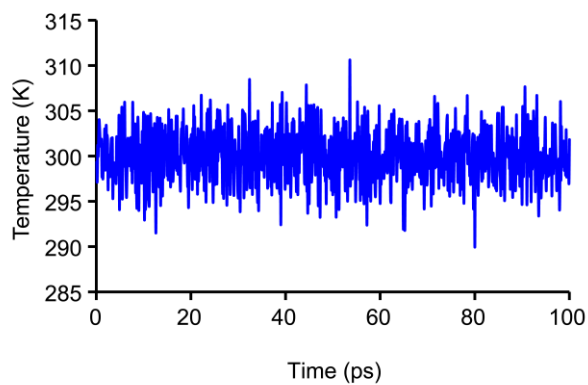

39

40 **Figure S2. Temperature (K) fluctuation versus time (ps) during the 100 ps of MD simulation**  
 41 **production**

42

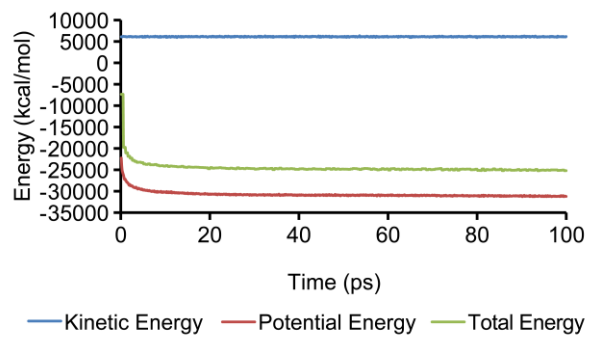

43

44 **Figure S3. The total energy, kinetic energy and Molential energy (kcal/mol) fluctuations**  
 45 **versus time (ps).**

46

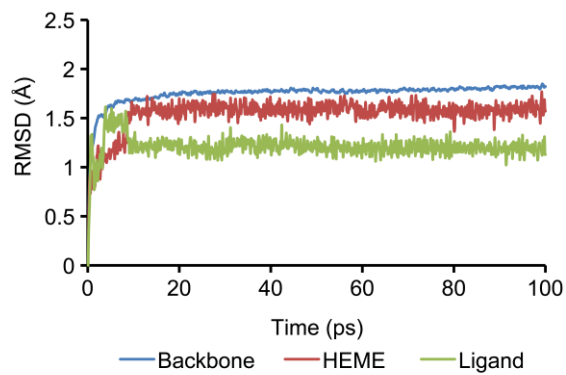

47

48 **Figure S4. RMSD of atomic coordination of protein backbone, HEME and ligand.**

49
